# Supplementary material for: Relationship between the roots of Hippophae rhamnoides at different stump heights and the root microenvironment in feldspathic sandstone areas
Source: PeerJ. 2023 Jan 27;11:e14819. doi: 10.7717/peerj.14819 (PMC9885864; doi:10.7717/peerj.14819)
Supplement: Supplemental Information 1 [file peerj-11-14819-s001.xlsx]

## Sheet: Information of the sample sites
Table 1. Information of the sample sites
stubble height	code	Repeat	Average tree height	East–west crown diameter	South–north crown diameter
0cm stubble	S1	1	73.87	50.33	54.07
		1	70.13	55.13	52.18
		1	72.03	54.08	51.52
10cm stubble	S2	2	83.94	64.73	61.29
		2	87.75	59.41	58.88
		2	84.09	64.23	61.96
15cm stubble	S3	3	86.97	63.12	58.67
		3	89.15	64.99	61.95
		3	85.24	61.85	62.41
20cm stubble	S4	4	81.57	62.55	56.04
		4	78.89	58.89	59.58
		4	77.5	58.5	56.49
unstubble	CK	5	108.63	89.63	82.11
		5	106.93	94.16	84.93
		5	111.17	93.14	85.65

## Sheet: root topological properties
Table 2. Topological properties of the roots of H. rhamnoides at different stubble heights
stubble height	code	Repeat	TI	qa	qb	Rb	FD	LnK
0cm stubble	S1	1	0.895916	0.632375	0.455423	1.891	1.13087	3.81603
		1	0.893959	0.626133	0.460315	1.849	1.16651	3.84869
		1	0.883545	0.614781	0.483451	1.879	1.10662	3.80744
10cm stubble	S2	2	0.859184	0.530211	0.311173	2.089	1.23952	3.91284
		2	0.860725	0.534801	0.326318	2.067	1.21187	3.9017
		2	0.8654	0.544728	0.338335	2.018	1.2404	3.91852
15cm stubble	S3	3	0.787872	0.402491	0.193037	2.339	1.4118	4.02602
		3	0.798018	0.354563	0.186177	2.308	1.39803	4.01358
		3	0.809814	0.381356	0.200285	2.295	1.41478	4.02704
20cm stubble	S4	4	0.932605	0.754789	0.519613	1.685	1.01415	3.7601
		4	0.938796	0.770876	0.484177	1.603	1.02953	3.7658
		4	0.934801	0.75681	0.500794	1.617	1.0107	3.76793
unstubble	CK	5	0.983086	0.932642	0.744987	1.195	0.815304	3.55234
		5	0.979046	0.917676	0.727774	1.159	0.844916	3.5728
		5	0.980836	0.924317	0.683654	1.138	0.895417	3.59964
Note: TI,qa,qb: Root topological indices, Rb : Root branching rate, FD :Root fractal dimension,LnK: Root fractal abundance
